# Supplementary material for: Mini-XT, a miniaturized tagmentation-based protocol for efficient sequencing of SARS-CoV-2
Source: Springer Nature journal article supplement (doi:10.1186/s12967-022-03307-9), 2022-03-03

Figure S1

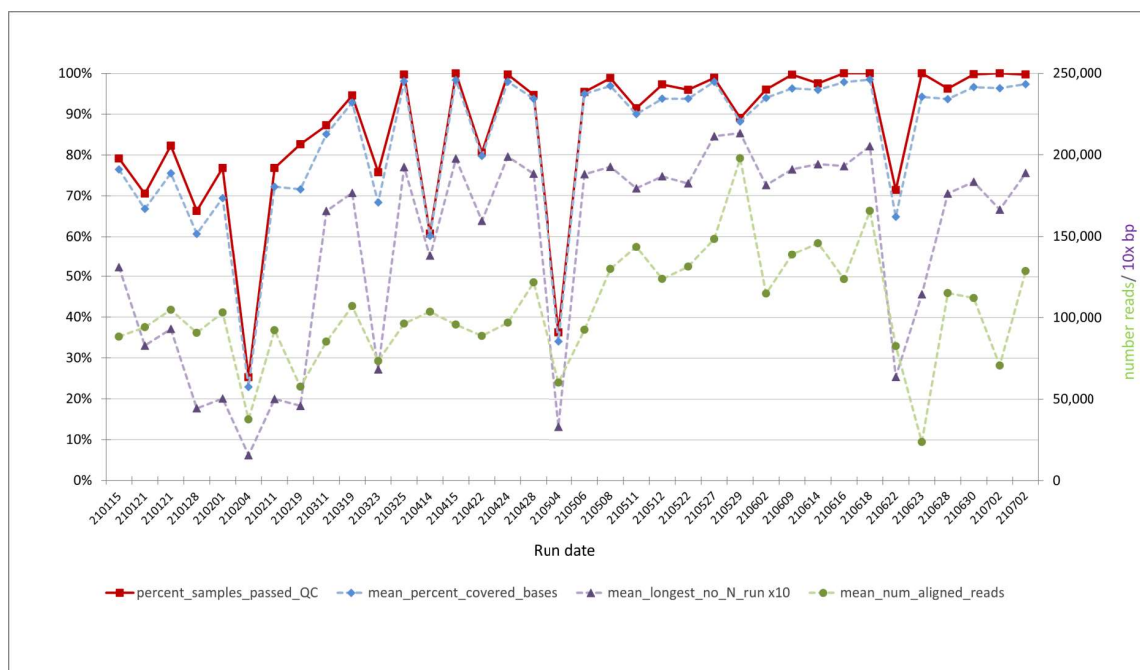

Figure S2

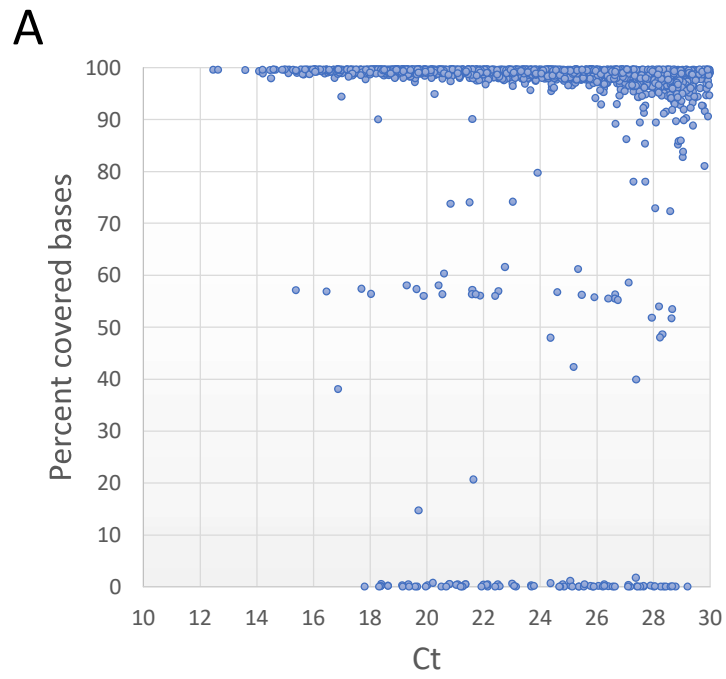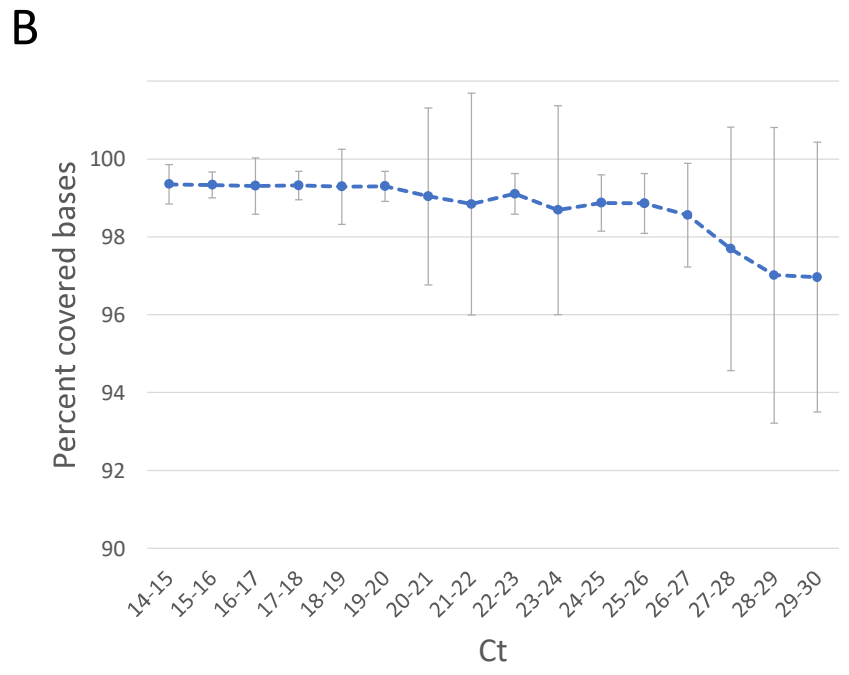

Figure S3

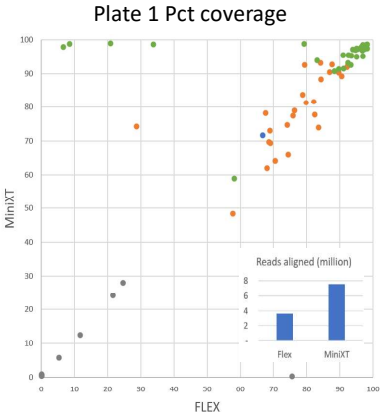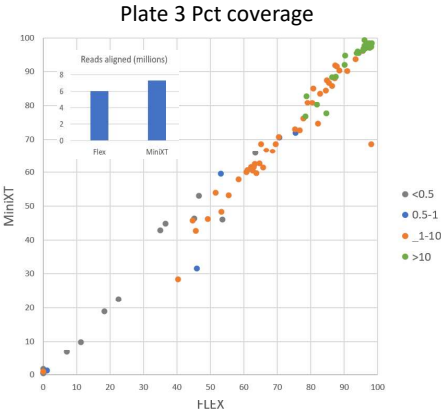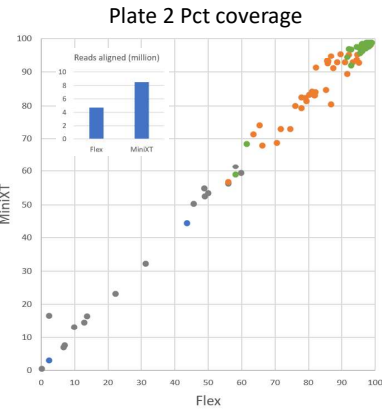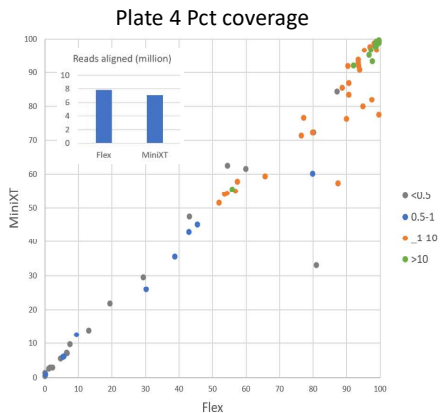

Figure S4

B.1.177.5 & B.1.177.86

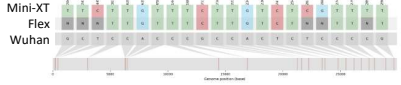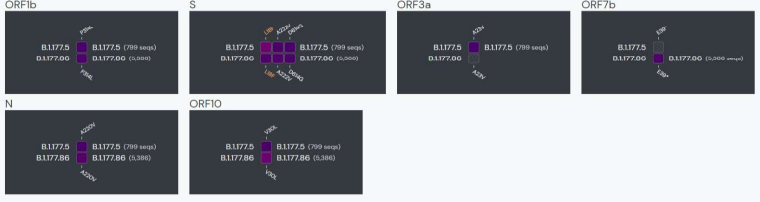

B.1.177.54 & B.1.177.55

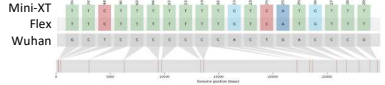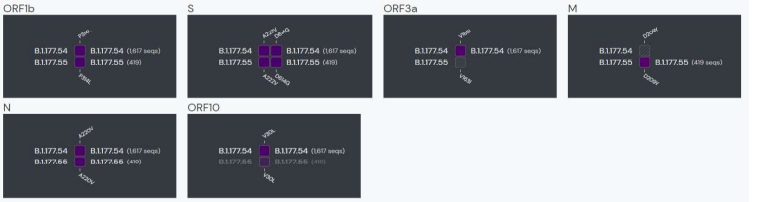

B.1.1 & B.1.36.36

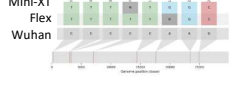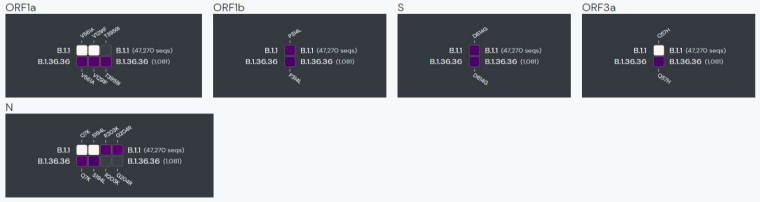

V.2 (B.1.177.54.2) & B.1.177.24

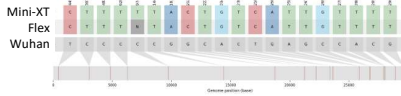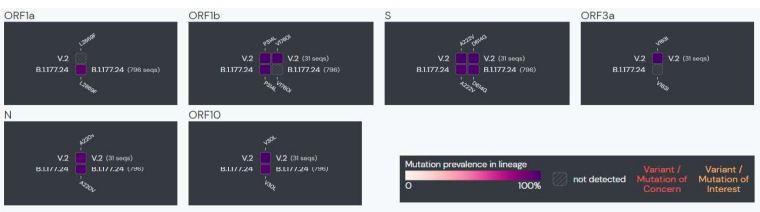

Figure S5

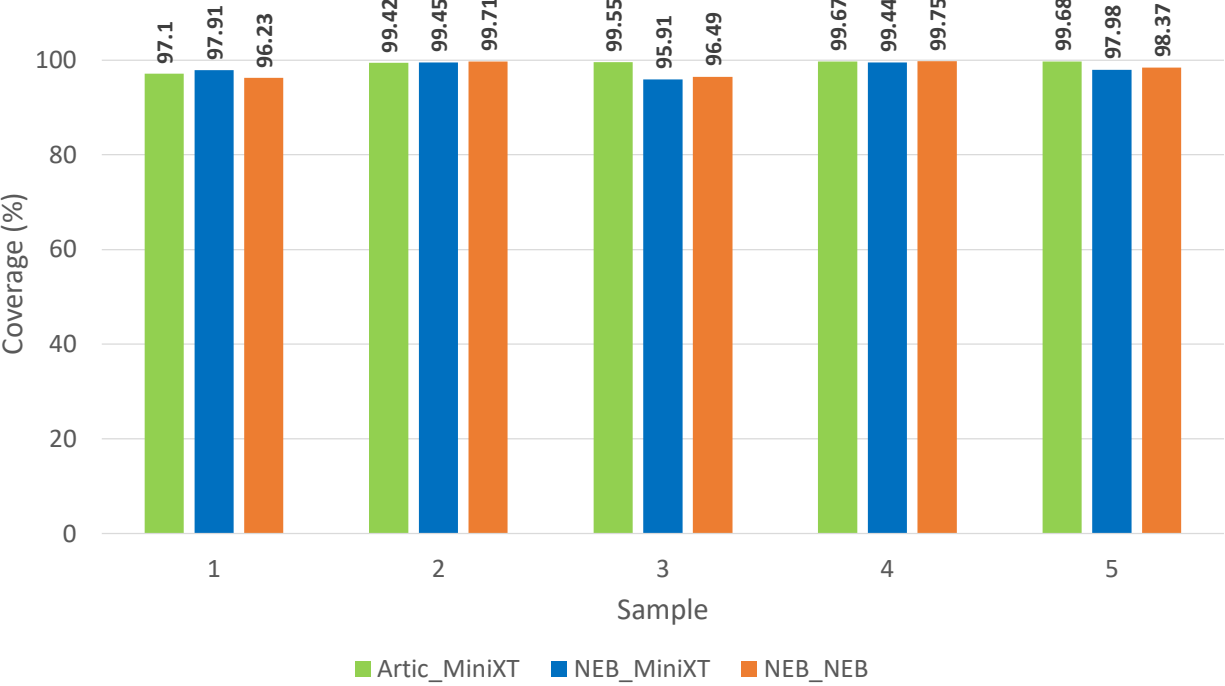

Supplement: MOESM2 [file 20189446]
